# Supplementary material for: Prehospital risk assessment in patients suspected of non-ST-segment elevation acute coronary syndrome: a systematic review and meta-analysis
Source: HighWire-hosted journal article supplement (doi:10.1136/bmjopen-2021-057305), 2022-04-01
Supplement: bmjopen-2021-057305supp001_data_supplement.pdf [file bmjopen-2021-057305supp001_data_supplement.pdf]

## Supplemental material

**Supplement to:** Demandt JPA, Zelis JM, Koks A, et al. Prehospital risk assessment in patients suspected of Non-ST-segment elevation Acute Coronary Syndrome – A systematic review and meta-analysis

**eAppendix 1.** Full search

**eAppendix 2.** Quality Assessment Tool for Diagnostic Accuracy Studies (QUADAS) Tool

**eAppendix 3.** Study Characteristics

**eAppendix 4.** Results of individual studies of symptoms

**eAppendix 5.** Results of individual studies of risk factors

**eAppendix 6.** Results of individual studies of electrocardiogram findings

**eAppendix 7.** Results of individual studies of biomarkers

**eAppendix 8.** Results of individual studies of Combined Risk Scores

**eAppendix 9.** Results of individual studies of general practitioner decision making

**eAppendix 10.** Forest plots

**eFigure 1.** Flow diagram of study inclusion

**eTable 1.** Performance of symptoms for risk assessment in non-ST-elevation Acute Coronary Syndrome

**eTable 2.** Performance of physical examination for risk assessment in non-ST-elevation Acute Coronary Syndrome

**eTable 3.** Performance of risk factors in EMS setting for risk assessment in non-ST-elevation Acute Coronary Syndrome

**eTable 4.** Performance of risk factors in primary care for risk assessment in non-ST-elevation Acute Coronary Syndrome

**eTable 5.** Additional information about Point-of-Care (POC) analyzers

## eAppendix 1. Full search

Search strategy in MEDLINE:

(ambulance OR pre-hospital OR prehospital OR triage OR paramedics OR ems) AND (ecg OR troponin OR "risk scores" OR POC) AND (acute coronary syndrome OR acs OR nstemi OR "chest pain" OR (acute coronary syndrome [MeSH Terms]) OR (chest pain[MeSH Terms])).

Specific for primary care studies, we performed a second search:

("general practitioner" OR "primary care" OR outpatient) AND (ecg OR troponin OR "risk scores" OR POC) AND (acute coronary syndrome OR acs OR nstemi OR "chest pain" OR (acute coronary syndrome [MeSH Terms]) OR (chest pain[MeSH Terms]))

For our EMBASE search, we added a limitation to exclude all MEDLINE journals and we replaced the MeSH terms with the appropriate Emtree terms.

((ambulance or pre-hospital or prehospital or triage or paramedics or ems).mp. or exp ambulance/) and (ecg or troponin or risk scores or POC).mp. and ((acute coronary syndrome or ACS or NSTEMI or chest pain).mp. or exp non st segment elevation acute coronary syndrome/ or exp acute coronary syndrome/).

In EMBASE we performed a second search as well for additional primary care studies.

(general practitioner OR primary care OR outpatient OR exp general practitioner/ OR primary health care/ ) and (ecg or troponin or risk scores or POC) and (acute coronary syndrome or ACS or NSTEMI or chest pain or exp non st segment elevation acute coronary syndrome/ or exp acute coronary syndrome/).

## eAppendix 2. Quality Assessment Tool for Diagnostic Accuracy Studies (QUADAS) Tool<sup>1</sup>

### QUADAS tool: description

1. Was the spectrum of patients representative of the patients who will receive the test in practice?  
Patients presenting in a prehospital setting (EMS, GP) with suspected ACS = yes, retrospective=no
2. Is the reference standard likely to classify the target condition correctly?  
If reference standard in hospital adjudication of ACS, especially NSTEMI or unstable AP; if reference standard is Major Adverse Cardiac Events (MACE), including at least acute myocardial infarction (AMI) =yes
3. Is the time period between reference standard and index test short enough to be reasonably sure that the target condition did not change between the two tests?  
Adjudicated diagnosis at dismissal. MACE within 6 weeks=yes
4. Did the whole sample or a random selection of the sample, receive verification using a reference standard of diagnosis?
5. Did patients receive the same reference standard irrespective of the index test result?
6. Was the reference standard independent of the index test (i.e., the index test did not form part of the reference standard)?
7. Were the reference standard results interpreted without knowledge of the results of the index test? (Index test results blinded)
8. Were the index test results interpreted without knowledge of the results of the reference standard? (Reference standard results blinded)
9. Were the same clinical data available when test results were interpreted as would be available when the test is used in practice?  
When the test executor had as much info as in clinical practice=yes
10. Were uninterpretable/intermediate test results reported?  
Not reported, numbers are correct=yes
11. Were withdrawals from the study explained?  
Not reported, numbers are correct=yes

Did the study provide a clear definition of what was to be considered a 'positive' result?

**QUADAS tool: judgement**

| Study            | 1 | 2 | 3 | 4 | 5 | 6 | 7 | 8 | 9 | 10 | 11 | A |
|------------------|---|---|---|---|---|---|---|---|---|----|----|---|
| Van Dongen 2018  | Y | Y | Y | Y | Y | N | U | Y | Y | Y  | Y  | Y |
| Van Dongen 2020  | Y | Y | Y | Y | Y | N | U | Y | Y | Y  | Y  | Y |
| Ishak 2018       | Y | Y | Y | Y | Y | N | U | U | Y | N  | N  | Y |
| Van Dongen 2020  | Y | Y | Y | Y | Y | N | U | Y | Y | Y  | Y  | Y |
| Bruins Slot 2013 | Y | Y | Y | N | Y | Y | Y | Y | Y | N  | Y  | Y |
| Andersson 2015   | Y | Y | Y | Y | Y | N | Y | Y | Y | N  | Y  | Y |
| Schols 2019      | Y | Y | Y | Y | U | Y | Y | Y | Y | Y  | Y  | U |
| Willemsen 2019   | Y | Y | Y | Y | Y | Y | Y | Y | Y | Y  | Y  | Y |
| Nilsson 2013     | Y | Y | Y | Y | Y | N | Y | Y | Y | N  | Y  | Y |
| Anroedh 2018     | Y | Y | Y | Y | Y | Y | Y | Y | Y | Y  | N  | - |
| Svensson 2003    | Y | Y | Y | Y | Y | N | U | U | Y | N  | N  | Y |
| Stopyra 2020     | Y | Y | Y | Y | Y | N | U | Y | Y | N  | N  | Y |
| Stengaard 2013   | Y | Y | Y | Y | Y | N | Y | Y | Y | Y  | Y  | Y |
| Sagel 2021       | Y | Y | Y | Y | Y | N | U | Y | Y | N  | Y  | Y |
| Rasmussen 2019   | Y | Y | U | Y | Y | N | N | Y | Y | N  | Y  | Y |

Y = yes; N = no; U = unclear

## eAppendix 3.

| eAppendix 3. Study Characteristics     |            |                          |                  |                                                                                                                                                                                                        |                                         |
|----------------------------------------|------------|--------------------------|------------------|--------------------------------------------------------------------------------------------------------------------------------------------------------------------------------------------------------|-----------------------------------------|
| Source                                 | Study size | Incidence of ACS, No (%) | Clinical Setting | Diagnostic tests                                                                                                                                                                                       | Reference standard                      |
| Van Dongen et al., <sup>6</sup> 2018   | 700        | 116 (17)                 | EMS              | Male<br>DM<br>Obesity<br>Family history of CAD<br>Current smoker<br>Previous AMI<br>Previous PCI<br>Previous CABG<br>Previous TIA/Stroke<br>Previous PAV<br>POC- Troponin<br>HEAR score<br>HEART score | 30-day MACE: ACS, death, PCI/CABG       |
| Van Dongen et al., <sup>13</sup> 2019  | 689        | 116 (17)                 | EMS              | Core-lab PMHP score<br>Hs-Troponin                                                                                                                                                                     | 30-day MACE: ACS, death, PCI/CABG       |
| Ishak et al., <sup>14</sup> 2016       | 1127       | 192 (17)                 | EMS              | Modified HEART score                                                                                                                                                                                   | Final hospital diagnosis: NSTEMI or uAP |
| Van Dongen et al., <sup>15</sup> 2018  | 700        | 96 (14)                  | EMS              | HEART score                                                                                                                                                                                            | Final hospital diagnosis: NSTEMI or uAP |
| Bruins Slot et al., <sup>10</sup> 2013 | 298        | 66 (22)                  | GP               | H-FABP                                                                                                                                                                                                 | Final hospital diagnosis: ACS           |
| Andersson, et al., <sup>8</sup> 2015   | 115        | 6 (5)                    | GP               | Hs-Troponin<br>POC-Troponin                                                                                                                                                                            | Final hospital diagnosis: ACS           |
| Schols et al., <sup>3</sup> 2019       | 243        | 45 (19)                  | GP               | Chest pain<br>Duration of symptoms<br>Worse with exercise<br>Pressure pain<br>Patients assumes cardiac origin of pain<br>History of clinical vascular disease                                          | Final hospital diagnosis: ACS           |

|                                     |      |          |     |                                                                                                                                                                                   |                                            |
|-------------------------------------|------|----------|-----|-----------------------------------------------------------------------------------------------------------------------------------------------------------------------------------|--------------------------------------------|
|                                     |      |          |     | Male<br>Pain not reproduced on palpation<br>ECG<br>GP immediately suspected a serious condition<br>MHS<br>GP probability assessment<br>Combines MHS and GP probability assessment |                                            |
| Willemsen et al., <sup>4</sup> 2019 | 303  | 32 (11)  | GP  | H-FABP<br>GP decision to refer<br>CRS 1-4                                                                                                                                         | Final hospital diagnosis:<br>ACS           |
| Nilsson et al., <sup>9</sup> 2012   | 196  | 13 (7)   | GP  | POC-Troponin<br>GP decision to refer<br>GP decision to refer with POC-Troponin                                                                                                    | Final hospital diagnosis:<br>ACS           |
| Anroedh et al., <sup>16</sup> 2018  | 1421 | 144 (10) | EMS | ECG                                                                                                                                                                               | Final hospital diagnosis:<br>NSTEMI or uAP |
| Svensson et al., <sup>2</sup> 2002  | 538  | 307 (57) | EMS | Pale<br>Nausea<br>Clammy<br>AP<br>Heart failure<br>ECG<br>Myoglobin<br>CK-MB<br>Troponin                                                                                          | Final hospital diagnosis:<br>ACS           |
| Stopyra et al., <sup>5</sup> 2020   | 395  | 74 (19)  | EMS | Male<br>DM<br>Obesity<br>Family history of CAD<br>Current smoker<br>Previous AMI<br>Previous PCI<br>Previous CABG<br>Previous TIA/Stroke                                          | 30-day MACE:<br>ACS, death                 |

|                                                                                                                                                                                                                                                                                                                                                                                                                                                                                                                                                                                                                                                                                                                        |       |          |     |                                                                                                                                      |                                     |
|------------------------------------------------------------------------------------------------------------------------------------------------------------------------------------------------------------------------------------------------------------------------------------------------------------------------------------------------------------------------------------------------------------------------------------------------------------------------------------------------------------------------------------------------------------------------------------------------------------------------------------------------------------------------------------------------------------------------|-------|----------|-----|--------------------------------------------------------------------------------------------------------------------------------------|-------------------------------------|
|                                                                                                                                                                                                                                                                                                                                                                                                                                                                                                                                                                                                                                                                                                                        |       |          |     | Previous PAV<br>Hypercholesterolemia<br>Hypertension<br>Prior coronary disease<br>Heart failure<br>PMHP score<br>Core-lab PMHP score |                                     |
| Stengaard et al., <sup>7</sup> 2013                                                                                                                                                                                                                                                                                                                                                                                                                                                                                                                                                                                                                                                                                    | 985   | 227 (23) | EMS | Male<br>DM<br>Current smoker<br>Previous AMI<br>Previous PCI<br>Previous CABG<br>Previous smoker<br>POC-Troponin                     | Final hospital diagnosis:<br>ACS    |
| Sagel et al., <sup>12</sup> 2021                                                                                                                                                                                                                                                                                                                                                                                                                                                                                                                                                                                                                                                                                       | 435   | 53 (12)  | EMS | preHEART score<br>HEART score                                                                                                        | 3- and 7-day MACE:<br>ACS or death  |
| Rasmussen et al., <sup>11</sup> 2017                                                                                                                                                                                                                                                                                                                                                                                                                                                                                                                                                                                                                                                                                   | 17938 | 447 (2)  | EMS | POC-Troponin                                                                                                                         | Final hospital diagnosis:<br>NSTEMI |
| Abbreviations: ACS, Acute Coronary Syndrome; GP, General practitioner; EMS, Emergency Medical Services; DM, diabetes mellitus; AMI, acute myocardial infarction; CABG, Coronary Artery Bypass Grafting; PCI, Percutaneous Coronary Intervention; TIA; Transient ischemic attack, PAV; Peripheral artery disease; AP, angina pectoris; CAD, Coronary artery disease; POC, Point-of-Care; HS, high sensitive; H-FABP; Heart-type Fatty Acid Binding Protein; HEART, History, ECG, Age, Risk Factors, Troponin; PMHP, prehospital modified HEART pathway; CRS, Combined Risk Scores; MHS, Marburg Heart Score; NSTEMI, non-ST-elevation myocard infarct; UAP, unstable angina pectoris; MACE, Major Adverse Cardiac Event |       |          |     |                                                                                                                                      |                                     |



**eAppendix 4.**

| <b>eAppendix 4. Results of individual studies of symptoms</b>                                   |                                         |                    |     |     |     |     |
|-------------------------------------------------------------------------------------------------|-----------------------------------------|--------------------|-----|-----|-----|-----|
| Study                                                                                           | Characteristic                          | Total no. patients | TP  | FP  | FN  | TN  |
| Svensson et al., <sup>2</sup> 2006                                                              | Chestpain                               | 536                | 294 | 213 | 13  | 16  |
|                                                                                                 | Dyspnoe                                 | 536                | 150 | 124 | 157 | 105 |
|                                                                                                 | Nausea                                  | 536                | 114 | 66  | 193 | 163 |
| Schols et al., <sup>3</sup> 2019                                                                | Chestpain                               | 243                | 39  | 176 | 6   | 22  |
|                                                                                                 | Worse with exertion                     | 188                | 17  | 69  | 19  | 83  |
|                                                                                                 | Chestpain feels like pressure pain      | 212                | 31  | 154 | 8   | 19  |
|                                                                                                 | Patients assumes cardiac origin of pain | 242                | 28  | 108 | 17  | 89  |
|                                                                                                 | Symptoms duration <1h                   | 243                | 39  | 176 | 6   | 22  |
|                                                                                                 | Symptoms duration (1-24h)               | 243                | 23  | 15  | 22  | 83  |
|                                                                                                 | Symptoms duration (>24h)                | 243                | 19  | 63  | 26  | 135 |
| Abbreviations: TP, true positives; FP, false positives; FN, false negatives, TN, true negatives |                                         |                    |     |     |     |     |

## eAppendix 5.

| eAppendix 5. Results of individual studies of risk factors |                        |                    |     |     |     |     |
|------------------------------------------------------------|------------------------|--------------------|-----|-----|-----|-----|
| Study                                                      | Characteristic         | Total no. patients | TP  | FP  | FN  | TN  |
| Stopyra et al., <sup>5</sup> 2020                          | Prior coronary disease | 389                | 37  | 76  | 37  | 239 |
|                                                            | Previous PAV           | 395                | 4   | 17  | 70  | 304 |
| Van Dongen et al., <sup>6</sup> 2018                       | Previous PAV           | 700                | 11  | 20  | 105 | 564 |
| Svensson et al., <sup>2</sup> 2003                         | Previous AMI           | 536                | 160 | 80  | 147 | 149 |
| Stopyra et al., <sup>5</sup> 2020                          | Previous AMI           | 589                | 28  | 43  | 46  | 472 |
| Van Dongen et al., <sup>6</sup> 2018                       | Previous AMI           | 700                | 34  | 116 | 82  | 468 |
| Stengaard et al., <sup>7</sup> 2013                        | Previous AMI           | 985                | 82  | 206 | 149 | 548 |
| Stopyra et al., <sup>5</sup> 2020                          | Previous CABG          | 390                | 8   | 27  | 66  | 289 |
| Van Dongen et al., <sup>6</sup> 2018                       | Previous CABG          | 700                | 14  | 52  | 102 | 532 |
| Stengaard et al., <sup>7</sup> 2013                        | Previous CABG          | 985                | 21  | 13  | 210 | 721 |
| Stopyra et al., <sup>5</sup> 2020                          | Previous PCI           | 395                | 19  | 78  | 55  | 243 |
| Van Dongen et al., <sup>6</sup> 2018                       | Previous PCI           | 700                | 42  | 133 | 74  | 451 |
| Stengaard et al., <sup>7</sup> 2013                        | Previous PCI           | 985                | 73  | 179 | 158 | 575 |
| Stopyra et al., <sup>5</sup> 2020                          | Previous TIA/Stroke    | 395                | 7   | 34  | 67  | 287 |
| Van Dongen et al., <sup>6</sup> 2018                       | Previous TIA/Stroke    | 700                | 11  | 32  | 105 | 552 |
| Svensson et al., <sup>2</sup> 2003                         | Current smoker         | 700                | 30  | 126 | 86  | 458 |
| Stopyra et al., <sup>5</sup> 2020                          | Current smoker         | 395                | 16  | 87  | 58  | 234 |
| Van Dongen et al., <sup>6</sup> 2018                       | Current smoker         | 700                | 30  | 126 | 86  | 458 |
| Stengaard et al., <sup>7</sup> 2013                        | Current smoker         | 1084               | 80  | 120 | 151 | 733 |
| Svensson et al., <sup>2</sup> 2003                         | Male gender            | 536                | 181 | 128 | 126 | 101 |
| Stopyra et al., <sup>5</sup> 2020                          | Male gender            | 395                | 43  | 142 | 31  | 179 |
| Van Dongen et al., <sup>6</sup> 2018                       | Male gender            | 700                | 88  | 313 | 28  | 271 |
| Stengaard et al., <sup>7</sup> 2013                        | Male gender            | 985                | 170 | 413 | 61  | 341 |
| Svensson et al., <sup>2</sup> 2003                         | AP                     | 536                | 196 | 115 | 111 | 114 |

|                                                                                                                                                                                                                                                                                                                                                                                                                                                                                        |                                      |     |     |     |     |     |
|----------------------------------------------------------------------------------------------------------------------------------------------------------------------------------------------------------------------------------------------------------------------------------------------------------------------------------------------------------------------------------------------------------------------------------------------------------------------------------------|--------------------------------------|-----|-----|-----|-----|-----|
| Stopyra et al., <sup>5</sup> 2020                                                                                                                                                                                                                                                                                                                                                                                                                                                      | Hypercholesterolemia                 | 395 | 26  | 83  | 48  | 238 |
| Van Dongen et al., <sup>6</sup> 2018                                                                                                                                                                                                                                                                                                                                                                                                                                                   | Hypercholesterolemia                 | 700 | 61  | 214 | 55  | 370 |
| Stengaard et al., <sup>7</sup> 2013                                                                                                                                                                                                                                                                                                                                                                                                                                                    | Hypercholesterolemia                 | 985 | 194 | 624 | 37  | 130 |
| Svensson et al., <sup>2</sup> 2003                                                                                                                                                                                                                                                                                                                                                                                                                                                     | DM                                   | 536 | 58  | 32  | 249 | 197 |
| Stopyra et al., <sup>5</sup> 2020                                                                                                                                                                                                                                                                                                                                                                                                                                                      | DM                                   | 395 | 29  | 94  | 45  | 227 |
| Van Dongen et al., <sup>6</sup> 2018                                                                                                                                                                                                                                                                                                                                                                                                                                                   | DM                                   | 700 | 26  | 87  | 90  | 497 |
| Stengaard et al., <sup>7</sup> 2013                                                                                                                                                                                                                                                                                                                                                                                                                                                    | DM                                   | 985 | 38  | 143 | 193 | 611 |
| Svensson et al., <sup>2</sup> 2003                                                                                                                                                                                                                                                                                                                                                                                                                                                     | Heart failure                        | 536 | 68  | 57  | 239 | 172 |
| Stopyra et al., <sup>5</sup> 2020                                                                                                                                                                                                                                                                                                                                                                                                                                                      | Heart failure                        | 389 | 14  | 40  | 59  | 276 |
| Svensson et al., <sup>2</sup> 2003                                                                                                                                                                                                                                                                                                                                                                                                                                                     | Hypertension                         | 536 | 107 | 57  | 200 | 172 |
| Stopyra et al., <sup>5</sup> 2020                                                                                                                                                                                                                                                                                                                                                                                                                                                      | Hypertension                         | 389 | 55  | 201 | 18  | 115 |
| Van Dongen et al., <sup>6</sup> 2018                                                                                                                                                                                                                                                                                                                                                                                                                                                   | Hypertension                         | 700 | 66  | 306 | 50  | 278 |
| Stengaard et al., <sup>7</sup> 2013                                                                                                                                                                                                                                                                                                                                                                                                                                                    | Hypertension                         | 985 | 133 | 405 | 98  | 349 |
| Stopyra et al., <sup>5</sup> 2020                                                                                                                                                                                                                                                                                                                                                                                                                                                      | Obesity                              | 383 | 29  | 152 | 45  | 157 |
| Van Dongen et al., <sup>6</sup> 2018                                                                                                                                                                                                                                                                                                                                                                                                                                                   | Obesity                              | 700 | 27  | 113 | 89  | 471 |
| Stengaard et al., <sup>7</sup> 2013                                                                                                                                                                                                                                                                                                                                                                                                                                                    | Previous smoker                      | 985 | 69  | 208 | 162 | 546 |
| Stopyra et al., <sup>5</sup> 2020                                                                                                                                                                                                                                                                                                                                                                                                                                                      | Family history of CAD                | 395 | 19  | 78  | 55  | 243 |
| Van Dongen et al., <sup>6</sup> 2018                                                                                                                                                                                                                                                                                                                                                                                                                                                   | Family history of CAD                | 700 | 47  | 277 | 69  | 307 |
| Schols et al., <sup>3</sup> 2019                                                                                                                                                                                                                                                                                                                                                                                                                                                       | Gender                               | 243 | 34  | 93  | 11  | 105 |
|                                                                                                                                                                                                                                                                                                                                                                                                                                                                                        | History of clinical vascular disease | 243 | 22  | 84  | 23  | 114 |
| Abbreviations: 95-CI, 95% confidence interval; LR+, positive likelihood ratio; LR- negative likelihood ratio; dOR, diagnostic odds ratio; DM, diabetes mellitus; AMI, acute myocardial infarction; CABG, Coronary Artery Bypass Grafting; PCI, Percutaneous Coronary Intervention; TIA; Transient ischemic attack, PAV; Peripheral artery disease; AP, angina pectoris; CAD, Coronary artery disease; TP, true positives; FP, false positives; FN, false negatives, TN, true negatives |                                      |     |     |     |     |     |

**eAppendix 6.**

| <b>eAppendix 6. Results of individual studies of electrocardiogram findings</b>                 |                  |                    |     |     |     |     |
|-------------------------------------------------------------------------------------------------|------------------|--------------------|-----|-----|-----|-----|
| Study                                                                                           | Characteristic   | Total no. patients | TP  | FP  | FN  | TN  |
| Anroedh et al., <sup>16</sup> 2018                                                              | Ischemic ECG     | 1421               | 69  | 457 | 75  | 820 |
| Svensson et al., <sup>2</sup> 2003                                                              | Ischemic ECG     | 536                | 52  | 126 | 255 | 103 |
| Schols et al., <sup>3</sup> 2019                                                                | Ischemic ECG     | 115                | 17  | 20  | 6   | 72  |
| Svensson et al., <sup>2</sup> 2003                                                              | Q-wave           | 536                | 33  | 1   | 274 | 228 |
|                                                                                                 | ST-depression    | 536                | 129 | 25  | 178 | 204 |
|                                                                                                 | T-wave inversion | 536                | 55  | 16  | 252 | 213 |
| Abbreviations: TP, true positives; FP, false positives; FN, false negatives, TN, true negatives |                  |                    |     |     |     |     |

## eAppendix 7.

| <b>eAppendix 7. Results of individual studies of biomarkers</b>                                                                                                                        |                |                    |     |      |      |       |
|----------------------------------------------------------------------------------------------------------------------------------------------------------------------------------------|----------------|--------------------|-----|------|------|-------|
| Study                                                                                                                                                                                  | Characteristic | Total no. patients | TP  | FP   | FN   | TN    |
| Svensson et al., <sup>2</sup> 2003                                                                                                                                                     | POC-Troponin   | 536                | 21  | 2    | 286  | 227   |
| Stengaard et al., <sup>7</sup> 2013                                                                                                                                                    | POC-Troponin   | 924                | 73  | 34   | 146  | 671   |
| Stopyra et al., <sup>5</sup> 2020                                                                                                                                                      | POC-Troponin   | 395                | 17  | 11   | 57   | 310   |
| Van Dongen et al., <sup>6</sup> 2018                                                                                                                                                   | POC-Troponin   | 700                | 43  | 26   | 73   | 558   |
| Rasmussen et al., <sup>11</sup> 2019                                                                                                                                                   | POC-Troponin   | 17938              | 640 | 1175 | 1026 | 15097 |
| Andersson et al., <sup>8</sup> 2015                                                                                                                                                    | POC-Troponin   | 115                | 2   | 2    | 4    | 107   |
| Nilsson et al., <sup>9</sup> 2013                                                                                                                                                      | POC-Troponin   | 128                | 2   | 3    | 5    | 118   |
| Willemsen et al., <sup>4</sup> 2019                                                                                                                                                    | H-FABP         | 291                | 8   | 8    | 23   | 252   |
| Bruins Slot et al., <sup>10</sup> 2013                                                                                                                                                 | H-FABP         | 298                | 26  | 14   | 40   | 218   |
| Svensson et al., <sup>2</sup> 2003                                                                                                                                                     | CK-MB          | 536                | 37  | 7    | 270  | 222   |
|                                                                                                                                                                                        | Myoglobin      | 536                | 25  | 9    | 282  | 220   |
| Andersson et al., <sup>8</sup> 2015                                                                                                                                                    | Hs-Troponin    | 115                | 5   | 26   | 1    | 83    |
| Abbreviations: TP, true positives; FP, false positives; FN, false negatives, TN, true negatives; POC, Point-of-Care; H-FABP; Heart-type Fatty Acid Binding Protein; HS, high-sensitive |                |                    |     |      |      |       |

## eAppendix 8.

| eAppendix 8. Results of individual studies of Combined Risk Scores                                                                                                                                                                                                                       |                                          |                  |     |     |    |     |
|------------------------------------------------------------------------------------------------------------------------------------------------------------------------------------------------------------------------------------------------------------------------------------------|------------------------------------------|------------------|-----|-----|----|-----|
| Study                                                                                                                                                                                                                                                                                    | Characteristic                           | Risk             | TP  | FP  | FN | TN  |
| Stopyra et al., <sup>5</sup> 2020                                                                                                                                                                                                                                                        | Core-lab PMHP                            | High             | 50  | 25  |    |     |
|                                                                                                                                                                                                                                                                                          |                                          | Intermediate     | 24  | 172 |    |     |
|                                                                                                                                                                                                                                                                                          |                                          | Low              | 0   | 172 |    |     |
|                                                                                                                                                                                                                                                                                          | PMHP                                     | High             | 17  | 11  |    |     |
|                                                                                                                                                                                                                                                                                          |                                          | Intermediate     | 50  | 193 |    |     |
|                                                                                                                                                                                                                                                                                          |                                          | Low              | 7   | 117 |    |     |
| Sagel et al., <sup>12</sup> 2021                                                                                                                                                                                                                                                         | preHEART                                 | High             | 55  | 56  |    |     |
|                                                                                                                                                                                                                                                                                          |                                          | Intermediate     | 117 | 797 |    |     |
|                                                                                                                                                                                                                                                                                          |                                          | Low              | 4   | 614 |    |     |
|                                                                                                                                                                                                                                                                                          | HEART                                    | High             | 67  | 122 |    |     |
|                                                                                                                                                                                                                                                                                          |                                          | Intermediate     | 51  | 648 |    |     |
|                                                                                                                                                                                                                                                                                          |                                          | Low              | 5   | 315 |    |     |
| Ishak et al., <sup>14</sup> 2018                                                                                                                                                                                                                                                         | Modified HEART                           | High             | 116 | 114 |    |     |
|                                                                                                                                                                                                                                                                                          |                                          | Intermediate     | 76  | 418 |    |     |
|                                                                                                                                                                                                                                                                                          |                                          | Low              | 0   | 403 |    |     |
| Willemsen et al., <sup>4</sup> 2019                                                                                                                                                                                                                                                      | CRS 1                                    | High - Low       | 28  | 130 | 4  | 141 |
|                                                                                                                                                                                                                                                                                          | CRS 2                                    | High - Low       | 26  | 130 | 6  | 141 |
|                                                                                                                                                                                                                                                                                          | CRS 3                                    | High - low       | 25  | 121 | 7  | 150 |
|                                                                                                                                                                                                                                                                                          | CRS 4                                    | High - Low       | 22  | 120 | 10 | 151 |
| Schols et al., <sup>3</sup> 2019                                                                                                                                                                                                                                                         | MHS                                      | Cut-off value 2  | 27  | 84  | 9  | 66  |
|                                                                                                                                                                                                                                                                                          | MHS                                      | Cut- off value 1 | 34  | 126 | 2  | 24  |
|                                                                                                                                                                                                                                                                                          | GP probability assessment                | High - Low       | 36  | 116 | 6  | 82  |
|                                                                                                                                                                                                                                                                                          | Combined MHS & GP probability assessment | High - Low       | 36  | 115 | 0  | 35  |
| Abbreviations: TP, true positives; FP, false positives; FN, false negatives, TN, true negatives; CRS, Combined Risk Scores; HEAR, History, ECG, Age, Risk Factors; POC, Point-of-Care; H-FABP, Heart-type Fatty Acid Binding Protein; MHS, Marburg Heart Score; GP, general practitioner |                                          |                  |     |     |    |     |

**eAppendix 9.**

| <b>eAppendix 9. Results of individual studies of general practitioner decision making</b>                                                     |                                              |                    |    |    |    |     |
|-----------------------------------------------------------------------------------------------------------------------------------------------|----------------------------------------------|--------------------|----|----|----|-----|
| Study                                                                                                                                         | Characteristic                               | Total no. patients | TP | FP | FN | TN  |
| Willemsen et al., <sup>4</sup> 2019                                                                                                           | GP decision to refer                         | 303                | 24 | 88 | 8  | 183 |
| Nilsson et al., <sup>9</sup> 2013                                                                                                             | GP decision to refer                         | 68                 | 6  | 23 | 0  | 39  |
|                                                                                                                                               | GP decision to refer with POC-Troponin       | 128                | 5  | 27 | 2  | 94  |
| Schols et al., <sup>3</sup> 2019                                                                                                              | GP immediately suspected a serious condition | 243                | 26 | 94 | 19 | 104 |
| Abbreviations: TP, true positives; FP, false positives; FN, false negatives, TN, true negatives; GP, General Practitioner; POC, Point-of-Care |                                              |                    |    |    |    |     |

## eAppendix 10. Forest plots

## Diabetes Mellitus

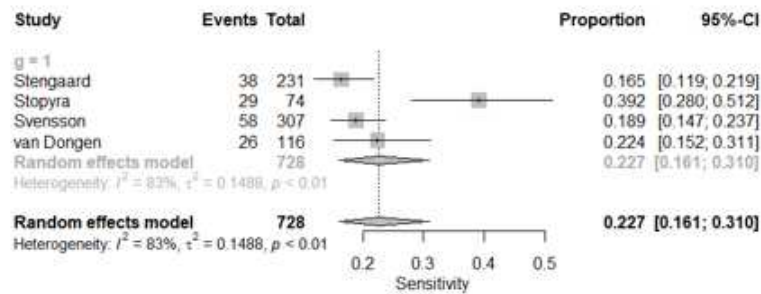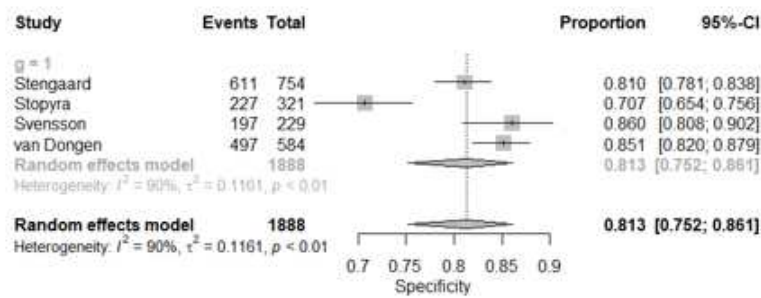

G=1 = Emergency Medical Services setting



## Current smoker

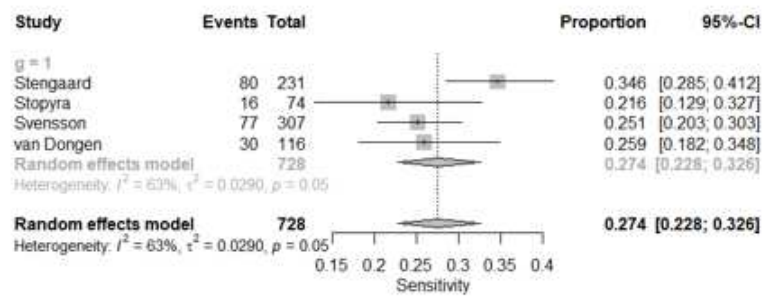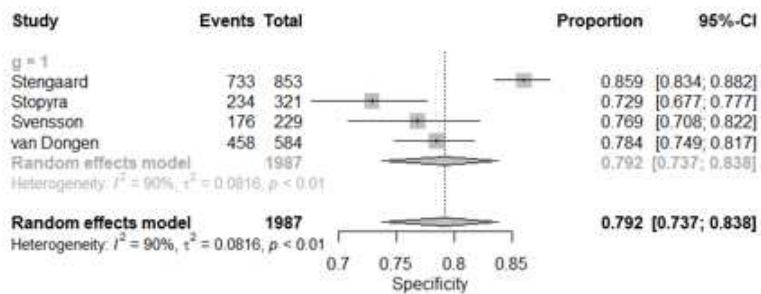

G=1 = Emergency Medical Services setting

### Male gender

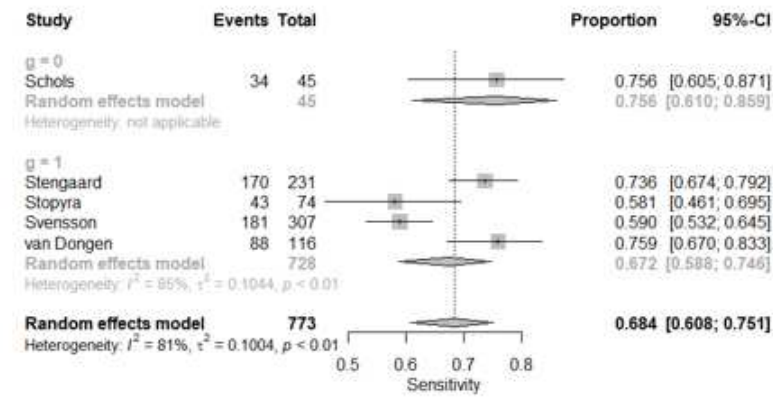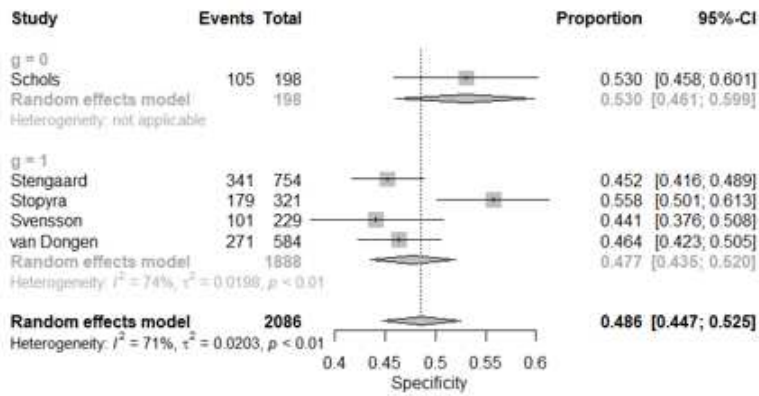

G=1 = Emergency Medical Services setting; G=0 = General Practitioner setting

## Hypercholesterolemia

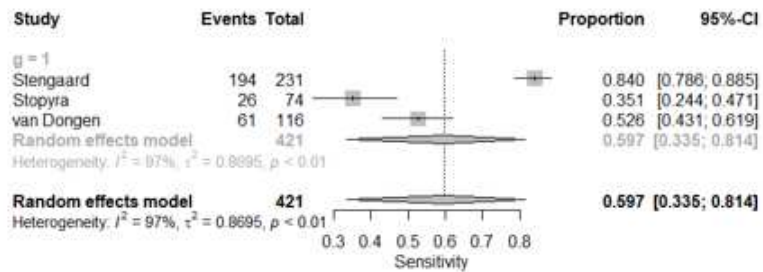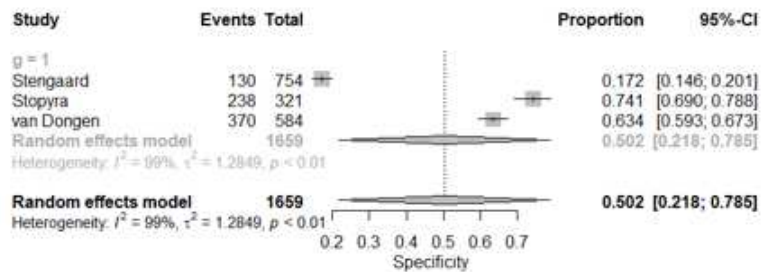

G=1 = Emergency Medical Services setting

## Hypertension

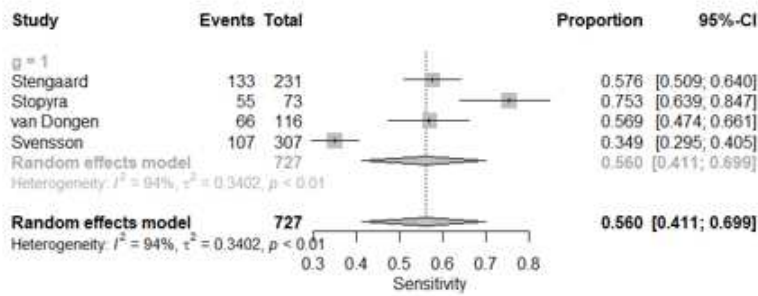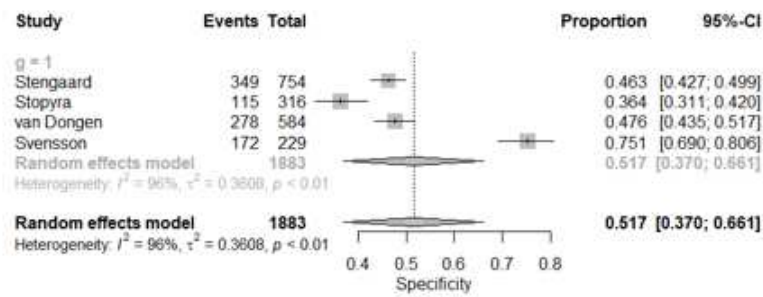

G=1 = Emergency Medical Services setting

## Previous AMI

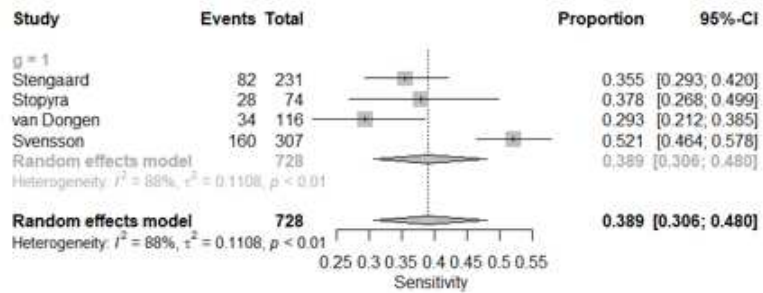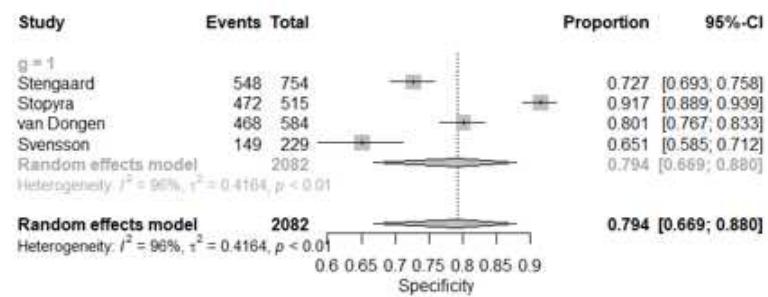

G=1 = Emergency Medical Services setting

AMI = Acute Myocardial Infarction

## Previous CABG

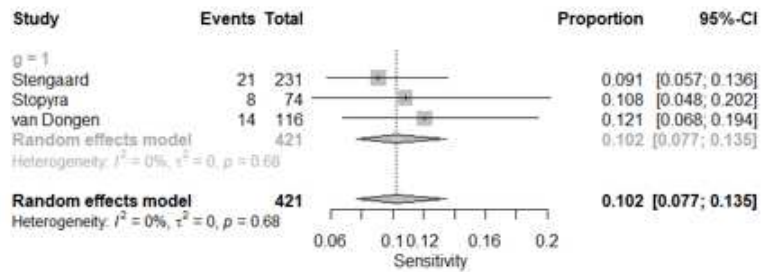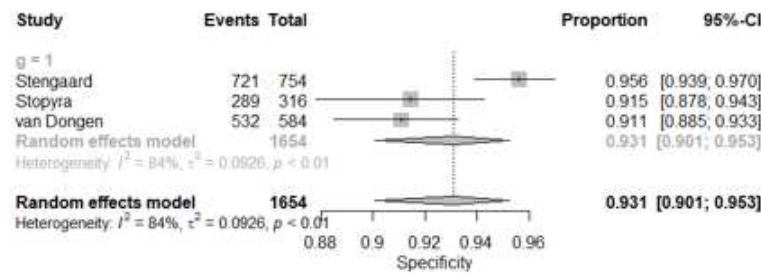

G=1 = Emergency Medical Services setting

CABG = Coronary Artery Bypass Graft

## Previous PCI

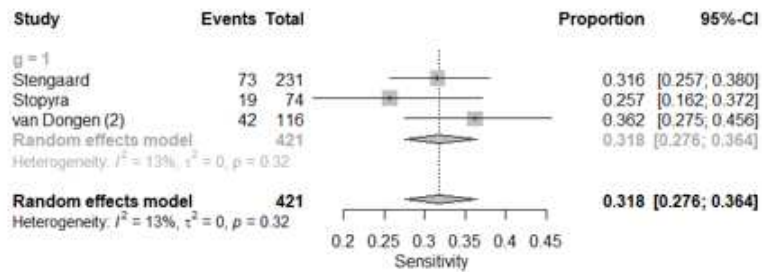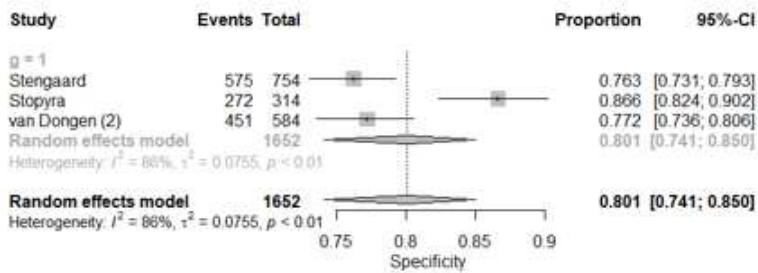

G=1 = Emergency Medical Services setting

PCI = Percutaneous Coronary Intervention

## POC Troponin

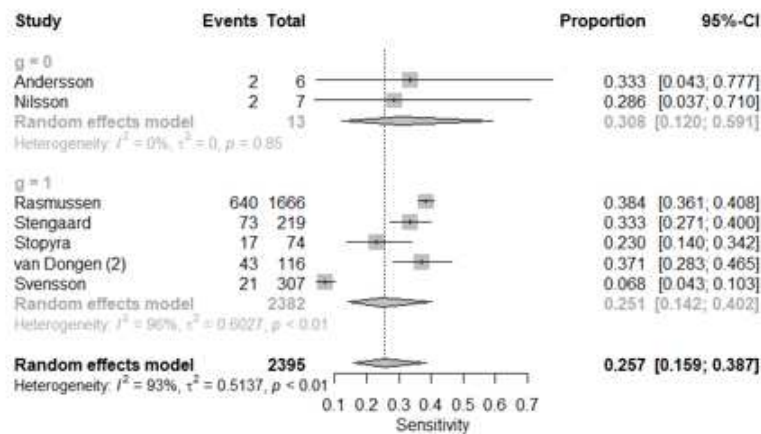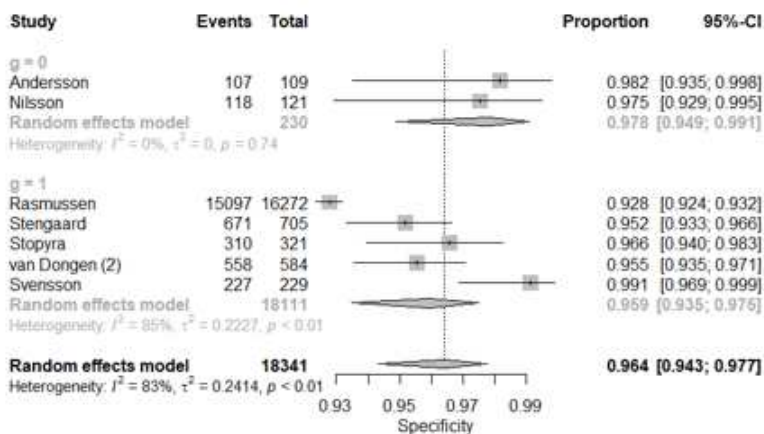

G=1 = Emergency Medical Services setting; G=0 = General Practitioner setting

POC = Point-of-Care



**eFigure 1. Flow diagram of study inclusion**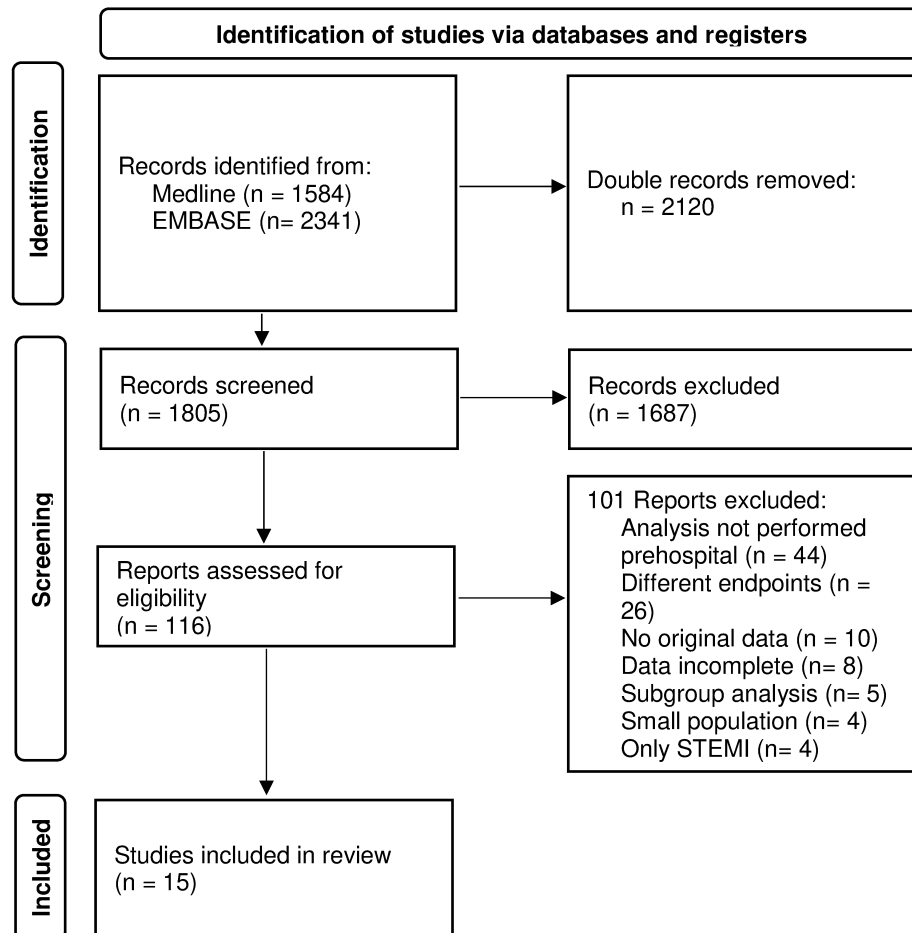

**eTable 1.**

| <b>eTable 1. Performance of symptoms for risk assessment in non-ST-elevation Acute Coronary Syndrome</b> |         |         |          |                        |                                 |                        |                                 |                  |                  |                  |  |
|----------------------------------------------------------------------------------------------------------|---------|---------|----------|------------------------|---------------------------------|------------------------|---------------------------------|------------------|------------------|------------------|--|
| Symptom                                                                                                  | Setting | Studies | Patients | Sensitivity, % (95-CI) | I <sup>2</sup> , % <sup>a</sup> | Specificity, % (95-CI) | I <sup>2</sup> , % <sup>a</sup> | LR+ (95-CI)      | LR- (95-CI)      | dOR (95-CI)      |  |
| Chestpain <sup>2</sup>                                                                                   | EMS     | 1       | 538      | 96 (93-98)             | -                               | 7 (4-11)               | -                               | 1.03 (0.98-1.07) | 0.61 (0.58-0.63) | 1.70 (0.80-3.61) |  |
| Dyspnoe <sup>2</sup>                                                                                     | EMS     | 1       | 536      | 49 (43-55)             | -                               | 46 (39-53)             | -                               | 0.90 (0.76-1.07) | 1.12 (0.94-1.32) | 0.81 (0.57-1.14) |  |
| Nausea <sup>2</sup>                                                                                      | EMS     | 1       | 536      | 37 (32-43)             | -                               | 71 (65-77)             | -                               | 1.29 (1.00-1.67) | 0.88 (0.68-1.14) | 1.46 (1.01-2.11) |  |
| Chestpain <sup>3</sup>                                                                                   | GP      | 1       | 243      | 87 (73-95)             | -                               | 11 (7-16)              | -                               | 0.98 (0.90-1.05) | 1.29 (1.11-1.29) | 0.81 (0.31-2.14) |  |
| Worse with exertion <sup>3</sup>                                                                         | GP      | 1       | 212      | 47 (30-65)             | -                               | 55 (46-63)             | -                               | 1.0 (0.79-1.38)  | 0.97 (0.73-1.28) | 1.08 (0.52-2.23) |  |
| Chestpain feels like pressure <sup>3</sup>                                                               | GP      | 1       | 212      | 79 (64-91)             | -                               | 11 (7-17)              | -                               | 0.89 (0.81-0.98) | 1.87 (1.70-2.05) | 0.48 (0.19-1.19) |  |
| Patient assumes cardiac origin of pain <sup>3</sup>                                                      | GP      | 1       | 242      | 62 (47-76)             | -                               | 45 (38-52)             | -                               | 1.13 (0.94-1.37) | 0.84 (0.69-1.01) | 1.36 (0.70-2.64) |  |
| Symptoms duration <1h <sup>3</sup>                                                                       | GP      | 1       | 243      | 87 (73-95)             | -                               | 11 (7-16)              | -                               | 0.98 (0.90-1.05) | 1.2 (1.11-1.29)  | 0.81 (0.31-2.14) |  |

|                                                                                                                                          |    |   |     |            |   |            |   |                  |                  |                  |
|------------------------------------------------------------------------------------------------------------------------------------------|----|---|-----|------------|---|------------|---|------------------|------------------|------------------|
| Symptoms duration (1-24h) <sup>3</sup>                                                                                                   | GP | 1 | 243 | 51 (36-66) | - | 42 (35-49) | - | 0.88 (0.72-1.08) | 1.16 (0.95-1.43) | 0.75 (0.39-1.44) |
| Symptoms duration (>24h) <sup>3</sup>                                                                                                    | GP | 1 | 243 | 42 (28-58) | - | 68 (61-75) | - | 1.33 (0.97-1.82) | 0.85 (0.62-1.16) | 1.57 (0.81-3.04) |
| Abbreviations: 95-CI, 95% confidence interval; LR+, positive likelihood ratio; LR- negative likelihood ratio; dOR, diagnostic odds ratio |    |   |     |            |   |            |   |                  |                  |                  |
| <sup>a</sup> When the summary measure was from less than 3 studies, I <sup>2</sup> was not calculated                                    |    |   |     |            |   |            |   |                  |                  |                  |

**eTable 2**

| <b>eTable 2. Performance of physical examination for risk assessment in non-ST-elevation Acute Coronary Syndrome</b>                     |         |         |          |                           |                                 |                           |                                 |                  |                  |                  |  |
|------------------------------------------------------------------------------------------------------------------------------------------|---------|---------|----------|---------------------------|---------------------------------|---------------------------|---------------------------------|------------------|------------------|------------------|--|
| Test                                                                                                                                     | Setting | Studies | Patients | Sensitivity, %<br>(95-CI) | I <sup>2</sup> , % <sup>a</sup> | Specificity, %<br>(95-CI) | I <sup>2</sup> , % <sup>a</sup> | LR+ (95-CI)      | LR- (95-CI)      | dOR (95-CI)      |  |
| Pale <sup>2</sup>                                                                                                                        | EMS     | 1       | 536      | 60 (54-65)                | -                               | 49 (42-56)                | -                               | 1.17 (1.00-1.38) | 0.82 (0.70-0.96) | 1.43 (1.01-2.02) |  |
| Clammy <sup>2</sup>                                                                                                                      | EMS     | 1       | 536      | 37 (32-43)                | -                               | 68 (62-74)                | -                               | 1.16 (0.21-1.49) | 0.92 (0.72-1.18) | 1.26 (0.88-1.81) |  |
| Pain not reproducible by palpation <sup>3</sup>                                                                                          | GP      | 1       | 210      | 92 (79-98)                | -                               | 16 (11-23)                | -                               | 1.10 (1.02-1.20) | 0.47 (0.43-0.51) | 2.35 (0.68-8.16) |  |
| Cardiac murmur <sup>4</sup>                                                                                                              | GP      | 1       | 250      | 4 (0-19)                  | -                               | 91 (86-94)                | -                               | 0.41 (0.08-1.91) | 1.06 (0.23-4.89) | 0.39 (0.05-3.03) |  |
| Abbreviations: 95-CI, 95% confidence interval; LR+, positive likelihood ratio; LR- negative likelihood ratio; dOR, diagnostic odds ratio |         |         |          |                           |                                 |                           |                                 |                  |                  |                  |  |
| <sup>a</sup> When the summary measure was from less than 3 studies, I <sup>2</sup> was not calculated                                    |         |         |          |                           |                                 |                           |                                 |                  |                  |                  |  |

eTable 3

| eTable 3. Performance of risk factors in EMS setting for risk assessment in non-ST-elevation Acute Coronary Syndrome |         |         |          |                          |                                 |                          |                                 |                  |                  |                  |
|----------------------------------------------------------------------------------------------------------------------|---------|---------|----------|--------------------------|---------------------------------|--------------------------|---------------------------------|------------------|------------------|------------------|
| Risk factor                                                                                                          | Setting | Studies | Patients | Sensitivity %<br>(95-CI) | I <sup>2</sup> , % <sup>a</sup> | Specificity %<br>(95-CI) | I <sup>2</sup> , % <sup>a</sup> | LR+ (95-CI)      | LR- (95-CI)      | dOR (95-CI)      |
| Prior coronary disease <sup>5</sup>                                                                                  | EMS     | 1       | 389      | 50 (38-62)               | -                               | 76 (71-80)               | -                               | 2.07 (1.58-2.71) | 0.66 (0.50-0.86) | 3.14 (1.86-5.31) |
| Previous PAV <sup>5,6</sup>                                                                                          | EMS     | 2       | 1095     | 8 (1-16)                 | -                               | 96 (92-98)               | -                               | 1.93 (0.38-5.53) | 0.96 (0.37-2.70) | 2.01 (0.33-6.35) |
| Previous AMI <sup>2,5-7</sup>                                                                                        | EMS     | 4       | 2618     | 39 (31-48)               | 88%                             | 79 (69-88)               | 96%                             | 1.84 (1.21-2.80) | 0.80 (0.71-0.91) | 2.32 (1.34-4.00) |
| Previous CABG <sup>5-7</sup>                                                                                         | EMS     | 3       | 2080     | 10 (8-14)                | 0%                              | 93 (90-95)               | 84%                             | 1.60 (1.14-2.24) | 0.96 (0.93-0.99) | 1.67 (1.15-2.44) |
| Previous PCI <sup>5-7</sup>                                                                                          | EMS     | 3       | 2080     | 32 (28-36)               | 13%                             | 80 (74-85)               | 86%                             | 1.49 (1.24-1.78) | 0.87 (0.81-0.93) | 1.71 (1.35-2.17) |
| Previous TIA/Stroke <sup>5,6</sup>                                                                                   | EMS     | 2       | 1095     | 9 (4-19)                 | -                               | 93 (86-96)               | -                               | 1.30 (0.45-3.21) | 0.98 (0.52-2.00) | 1.33 (0.37-3.7)  |
| Current smoker <sup>2,5-7</sup>                                                                                      | EMS     | 4       | 2618     | 27 (23-33)               | 63%                             | 79 (74-84)               | 90%                             | 1.29 (0.78-2.14) | 0.93 (0.80-1.07) | 1.39 (0.72-2.68) |
| Male gender <sup>2,5-7</sup>                                                                                         | EMS     | 4       | 2618     | 67 (59-75)               | 85%                             | 48 (44-52)               | 74%                             | 1.28 (1.12-1.45) | 0.69 (0.53-0.90) | 1.86 (1.39-2.80) |

|                                                                                                                                                                                                                                                                                                                                                                                                                                                                                                                         |     |   |      |            |     |            |     |                  |                  |                  |
|-------------------------------------------------------------------------------------------------------------------------------------------------------------------------------------------------------------------------------------------------------------------------------------------------------------------------------------------------------------------------------------------------------------------------------------------------------------------------------------------------------------------------|-----|---|------|------------|-----|------------|-----|------------------|------------------|------------------|
| AP <sup>2</sup>                                                                                                                                                                                                                                                                                                                                                                                                                                                                                                         | EMS | 1 | 536  | 64 (58-69) | -   | 50 (43-56) | -   | 1.27 (1.08-1.49) | 0.73 (0.62-0.85) | 1.75 (1.24-2.48) |
| Hypercholesterolemia <sup>5-7</sup>                                                                                                                                                                                                                                                                                                                                                                                                                                                                                     | EMS | 3 | 2080 | 60 (34-81) | 97% | 50 (22-79) | 99% | 1.23 (0.93-1.61) | 0.83 (0.73-0.94) | 1.47 (1.04-2.10) |
| DM <sup>2,5-7</sup>                                                                                                                                                                                                                                                                                                                                                                                                                                                                                                     | EMS | 4 | 2618 | 23 (16-31) | 83% | 81 (75-86) | 90% | 1.22 (0.95-1.57) | 0.96 (0.89-1.03) | 1.29 (0.93-1.80) |
| Heart failure <sup>2,5</sup>                                                                                                                                                                                                                                                                                                                                                                                                                                                                                            | EMS | 2 | 933  | 22 (11-30) | -   | 82 (69-91) | -   | 1.21 (0.65-2.49) | 0.95 (0.56-1.52) | 1.27 (0.57-3.2)  |
| Hypertension <sup>2,5-7</sup>                                                                                                                                                                                                                                                                                                                                                                                                                                                                                           | EMS | 4 | 2618 | 56 (41-70) | 94% | 52 (37-66) | 96% | 1.14 (1.04-1.25) | 0.88 (0.81-0.95) | 1.33 (1.10-1.61) |
| Obesity <sup>5,6</sup>                                                                                                                                                                                                                                                                                                                                                                                                                                                                                                  | EMS | 2 | 1095 | 29 (16-51) | -   | 70 (45-84) | -   | 0.99 (0.65-1.62) | 1.00 (0.70-1.47) | 0.99 (0.40-2.04) |
| Previous smoker <sup>7</sup>                                                                                                                                                                                                                                                                                                                                                                                                                                                                                            | EMS | 1 | 985  | 30 (24-36) | -   | 72 (69-76) | -   | 1.08 (0.89-1.31) | 0.97 (0.80-1.18) | 1.12 (0.81-1.55) |
| Family history of CAD <sup>5,6</sup>                                                                                                                                                                                                                                                                                                                                                                                                                                                                                    | EMS | 2 | 1095 | 35 (16-50) | -   | 61 (48-80) | -   | 0.89 (0.73-1.50) | 1.07 (0.69-1.39) | 0.82 (0.50-1.92) |
| <p>Abbreviations: 95-CI, 95% confidence interval; LR+, positive likelihood ratio; LR- negative likelihood ratio; dOR, diagnostic odds ratio; DM, diabetes mellitus; AMI, acute myocardial infarction; CABG, Coronary Artery Bypass Grafting; PCI, Percutaneous Coronary Intervention; TIA; Transient ischemic attack, PAV; Peripheral artery disease; AP, angina pectoris; CAD, Coronary artery disease</p> <p><sup>a</sup> When the summary measure was from less than 3 studies, I<sup>2</sup> was not calculated</p> |     |   |      |            |     |            |     |                  |                  |                  |

**eTable 4**

| <b>eTable 4. Performance of risk factors in primary care for risk assessment in non-ST-elevation Acute Coronary Syndrome</b>             |         |         |          |                           |                                 |                           |                                 |                  |                  |                  |
|------------------------------------------------------------------------------------------------------------------------------------------|---------|---------|----------|---------------------------|---------------------------------|---------------------------|---------------------------------|------------------|------------------|------------------|
| Risk factor                                                                                                                              | Setting | Studies | Patients | Sensitivity, %<br>(95-CI) | I <sup>2</sup> , % <sup>a</sup> | Specificity, %<br>(95-CI) | I <sup>2</sup> , % <sup>a</sup> | LR+ (95-CI)      | LR- (95-CI)      | dOR (95-CI)      |
| Male gender <sup>3</sup>                                                                                                                 | GP      | 1       | 243      | 77 (61-86)                | -                               | 53 (46-60)                | -                               | 1.61 (1.34-1.93) | 0.46 (0.38-0.55) | 3.49 (1.67-7.23) |
| History of clinical vascular disease <sup>3</sup>                                                                                        | GP      | 1       | 243      | 49 (34-64)                | -                               | 58 (50-65)                | -                               | 1.15 (0.90-1.48) | 0.89 (0.69-1.14) | 1.30 (0.68-2.48) |
| Abbreviations: 95-CI, 95% confidence interval; LR+, positive likelihood ratio; LR- negative likelihood ratio; dOR, diagnostic odds ratio |         |         |          |                           |                                 |                           |                                 |                  |                  |                  |
| <sup>a</sup> When the summary measure was from less than 3 studies, I <sup>2</sup> was not calculated                                    |         |         |          |                           |                                 |                           |                                 |                  |                  |                  |

**eTable 5.**

| <b>eTable 5. Additional information about Point-of-Care (POC) analyzers</b> |         |                                                 |                                  |                           |                       |                  |                                   |
|-----------------------------------------------------------------------------|---------|-------------------------------------------------|----------------------------------|---------------------------|-----------------------|------------------|-----------------------------------|
| Study                                                                       | Setting | Manufacturer                                    | Assay                            | Median duration (minutes) | Test result (minutes) | Success rate (%) | Positive threshold                |
| Van Dongen <sup>6</sup>                                                     | EMS     | Roche Diagnostics                               | Troponin T                       | 150                       | 8 – 12                | 90               | 0.04 µg/L                         |
| Andersson <sup>8</sup>                                                      | GP      | Roche Diagnostics                               | Troponin T                       | 600                       | 14                    | -                | 0.03 µg/L                         |
| Willemsen <sup>4</sup>                                                      | GP      | FABPulous BV                                    | H-FABP                           | -                         | -                     | -                | 4 µg/L                            |
| Nilsson <sup>9</sup>                                                        | GP      | Roche Diagnostics                               | Troponin T                       | 600                       | 14                    | -                | 0.03 µg/L                         |
| Bruins Slot <sup>10</sup>                                                   | GP      | Cardiodetect<br>Rennesens GmbH                  | H-FABP                           | 180                       | 15                    | 89               | 7 µg/L                            |
| Stopyra <sup>5</sup>                                                        | EMS     | Abbott                                          | Troponin I                       | -                         | 8-10                  | -                | 0.08 µg/L                         |
| Svensson <sup>2</sup>                                                       | EMS     | Cardiac Status<br>Spectral Diagnostics<br>Tests | Myoglobin<br>CK-MB<br>Troponin I | 90                        | 15                    | -                | 2.91 nmol/L<br>5 µg/L<br>0.1 µg/L |
| Stengaard <sup>7</sup>                                                      | EMS     | Roche Diagnostics                               | Troponin T                       | 70                        | 12                    | 90%              | 0.05 µg/L                         |



|                                                                                                                  |     |                   |            |     |      |   |           |
|------------------------------------------------------------------------------------------------------------------|-----|-------------------|------------|-----|------|---|-----------|
| Rasmussen <sup>11</sup>                                                                                          | EMS | Roche Diagnostics | Troponin T | 55  | 12   | - | 0.05 µg/L |
| Sage <sup>12</sup>                                                                                               | EMS | Abbott            | Troponin I | 294 | 8-10 | - | 0.34 µg/L |
| Abbreviations: POC, Point-of-Care; HS, high sensitive; GP, General practitioner; EMS, Emergency Medical Services |     |                   |            |     |      |   |           |

## References

1. Whiting PF, Weswood ME, Rutjes AW, et al. Evaluation of QUADAS, a tool for the quality assessment of diagnostic accuracy studies. *BMC Med Res Methodol* 2006;6:9. doi: 10.1186/1471-2288-6-9 [published Online First: 2006/03/08]
2. Svensson L, Isaksson L, Axelsson C, et al. Predictors of myocardial damage prior to hospital admission among patients with acute chest pain or other symptoms raising a suspicion of acute coronary syndrome. *Coron Artery Dis* 2003;14(3):225-31. doi: 10.1097/01.mca.0000063503.13456.0d [published Online First: 2003/04/19]
3. Schols AMR, Willemsen RTA, Bonten TN, et al. A Nationwide Flash-Mob Study for Suspected Acute Coronary Syndrome. *Ann Fam Med* 2019;17(4):296-303. doi: 10.1370/afm.2401 [published Online First: 2019/07/10]
4. Willemsen RT, Winkens B, Kietselaer BL, et al. Evaluating possible acute coronary syndrome in primary care: the value of signs, symptoms, and plasma heart-type fatty acid-binding protein (H-FABP). A diagnostic study. *BJGP Open* 2019;3(3) doi: 10.3399/bjgpopen19X101652 [published Online First: 2019/10/04]
5. Stopyra JP, Snavely AC, Smith LM, et al. Prehospital use of a modified HEART Pathway and point-of-care troponin to predict cardiovascular events. *PLoS One* 2020;15(10):e0239460. doi: 10.1371/journal.pone.0239460 [published Online First: 2020/10/08]
6. van Dongen DN, Fokkert MJ, Tolsma RT, et al. Value of Prehospital Troponin Assessment in Suspected Non-ST-Elevation Acute Coronary Syndrome. *Am J Cardiol* 2018;122(10):1610-16. doi: 10.1016/j.amjcard.2018.07.037 [published Online First: 2018/09/29]
7. Stengaard C, Sorensen JT, Ladefoged SA, et al. Quantitative point-of-care troponin T measurement for diagnosis and prognosis in patients with a suspected acute myocardial infarction. *Am J Cardiol* 2013;112(9):1361-6. doi: 10.1016/j.amjcard.2013.06.026 [published Online First: 2013/08/21]
8. Andersson PO, Karlsson JE, Landberg E, et al. Consequences of high-sensitivity troponin T testing applied in a primary care population with chest pain compared with a commercially available point-of-care troponin T analysis: an observational prospective study. *BMC Res Notes* 2015;8:210. doi: 10.1186/s13104-015-1174-0 [published Online First: 2015/06/04]
9. Nilsson S, Andersson PO, Borgquist L, et al. Point-of-Care Troponin T Testing in the Management of Patients with Chest Pain in the Swedish Primary Care. *Int J Family Med* 2013;2013:532093. doi: 10.1155/2013/532093 [published Online First: 2013/02/01]
10. Bruins Slot MH, Rutten FH, van der Heijden GJ, et al. Diagnostic value of a heart-type fatty acid-binding protein (H-FABP) bedside test in suspected acute coronary syndrome in primary care. *Int J Cardiol* 2013;168(2):1485-9. doi: 10.1016/j.ijcard.2012.12.050 [published Online First: 2013/01/22]
11. Rasmussen MB, Stengaard C, Sorensen JT, et al. Predictive value of routine point-of-care cardiac troponin T measurement for prehospital diagnosis and risk-stratification in patients with suspected acute myocardial infarction. *Eur Heart J Acute Cardiovasc Care* 2019;8(4):299-308. doi: 10.1177/2048872617745893 [published Online First: 2017/12/05]
12. Sagel DC, Vlaar PJ, Waardenburg I, et al. Pre-hospital risk stratification in patients with undifferentiated chest pain. *Submitted 2021*
